# Supplementary material for: Acid-active supramolecular anticancer nanoparticles based on cyclodextrin polyrotaxanes damaging both mitochondria and nuclei of tumor cells
Source: Royal Society of Chemistry journal article supplement (doi:10.1039/c8bm01020j), 2018-01-01
Supplement: c8bm01020j1.pdf [file c8bm01020j1.pdf]

## Supporting Information

### **Acid-Active Supramolecular Anticancer Nanoparticles Based on Cyclodextrin Polyrotaxanes Damaging both Mitochondria and Nuclei of Tumor Cells**

Shuang Bai<sup>a,b</sup>, Xiaoli Zhang<sup>c</sup>, Xiaoqian Ma<sup>a,b</sup>, Jiucun Chen<sup>a,b</sup>, Qiubing Chen<sup>a,b</sup>, Xiaoxiao Shi<sup>a,b</sup>, Meili Hou<sup>a,b</sup>, Peng Xue<sup>a,b</sup>, Yuejun Kang<sup>a,b\*</sup>, Zhigang Xu<sup>a,b\*</sup>

<sup>a</sup>Institute for Clean Energy and Advanced Materials, Faculty of Materials and Energy, Southwest University, Chongqing 400715, P. R. China

<sup>b</sup>Chongqing Engineering Research Centre for Micro-Nano Biomedical Materials and Devices, Chongqing 400715, P.R. China.

<sup>c</sup>Department of Hematology and Oncology, Shenzhen Children's Hospital, Shenzhen, Guangdong 518038, P.R. China

Z. Xu ([zgXu@swu.edu.cn](mailto:zgXu@swu.edu.cn)); Fax: +86-23-68253204; Tel: +86-23-68253792

Y. Kang ([yjkang@swu.edu.cn](mailto:yjkang@swu.edu.cn)); Fax: +86-23-68253204; Tel: +86-23-68254056

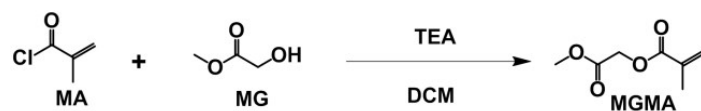

**Figure S1.** The synthetic route of MGMA

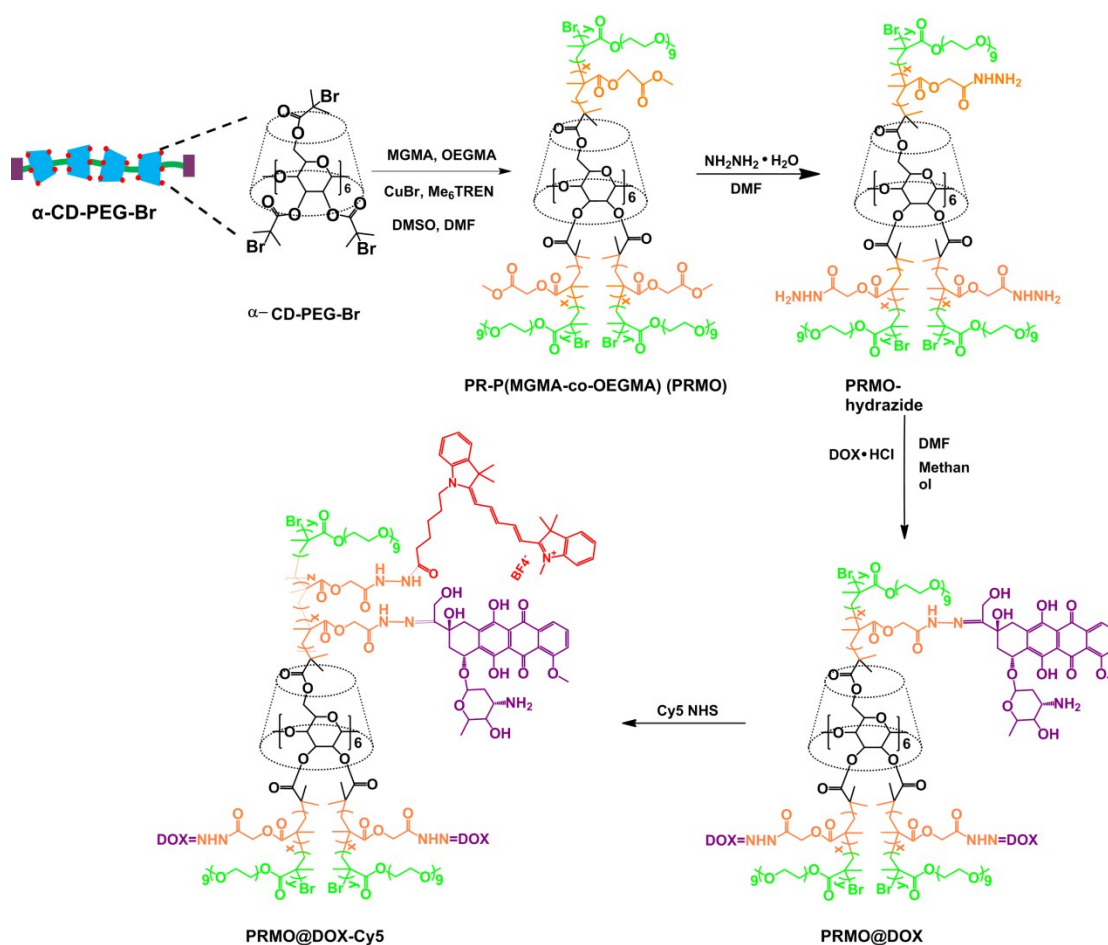

**Figure S2.** The synthetic route of PRMO@DOX and PRMO@DOX-Cy5.

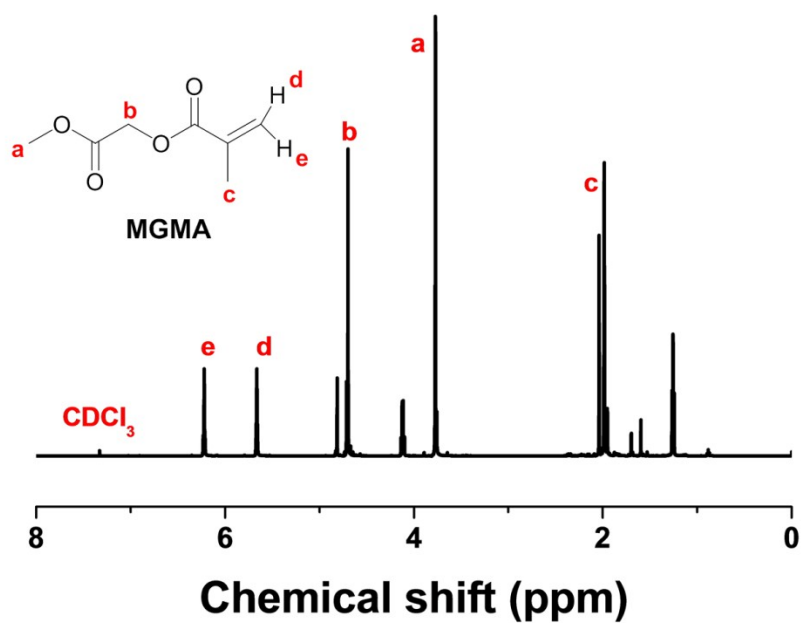

**Figure S3.**  $^1\text{H}$  NMR spectrum of MGMA monomer.

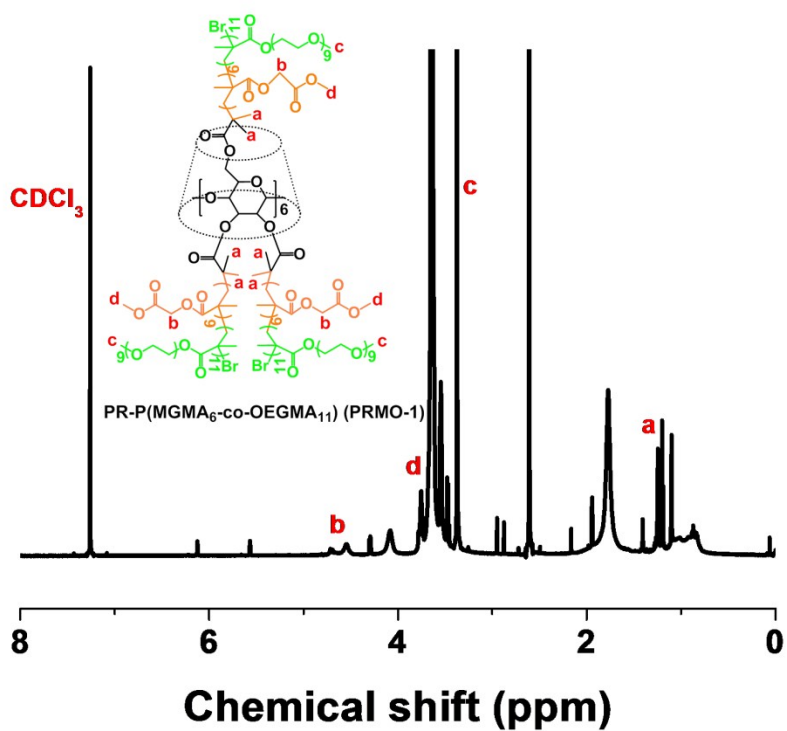

**Figure S4.**  $^1\text{H}$  NMR spectrum of PRMO-1.

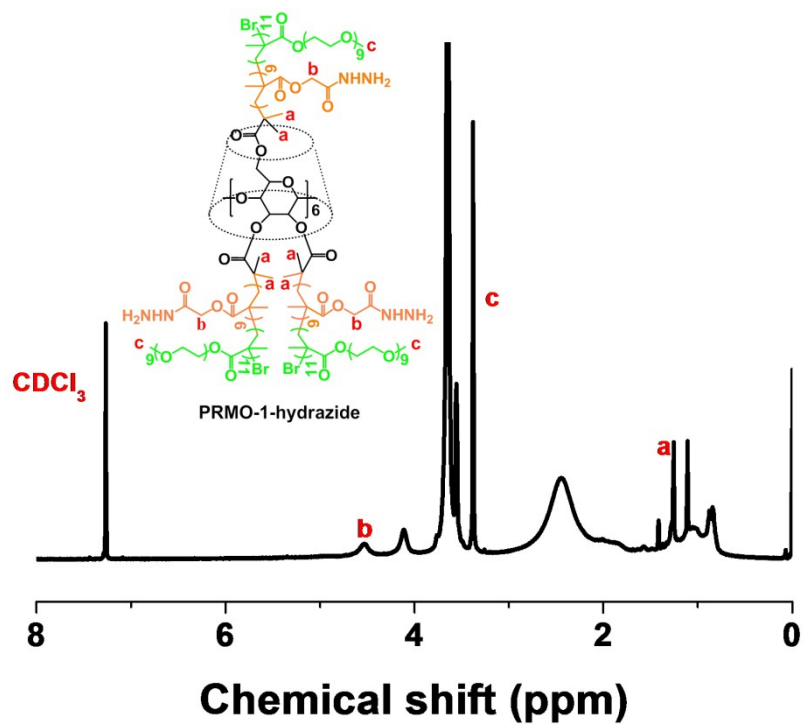

**Figure S5.** <sup>1</sup>H NMR spectrum of PRMO-1-hydrazide.

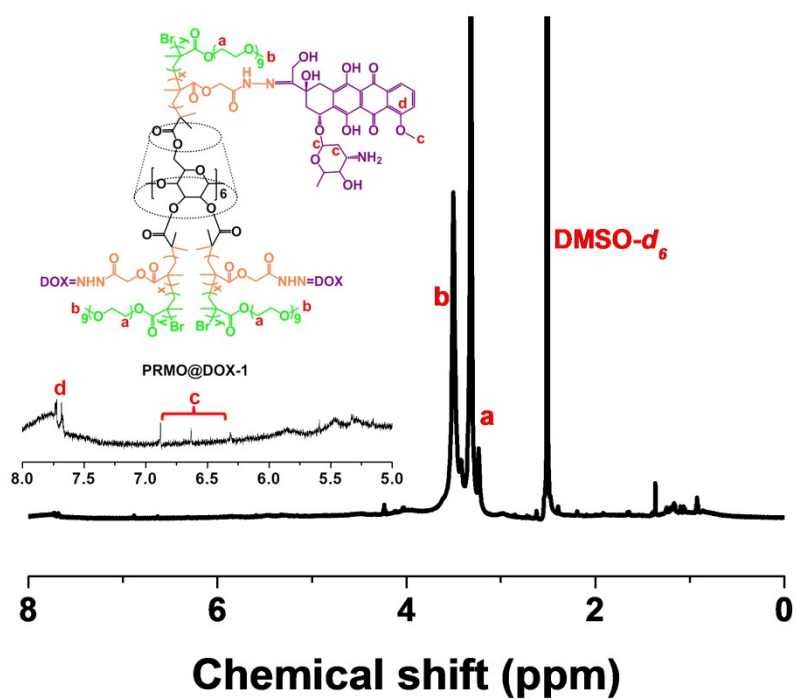

**Figure S6.** <sup>1</sup>H NMR spectrum of PRMO@DOX-1 prodrug.

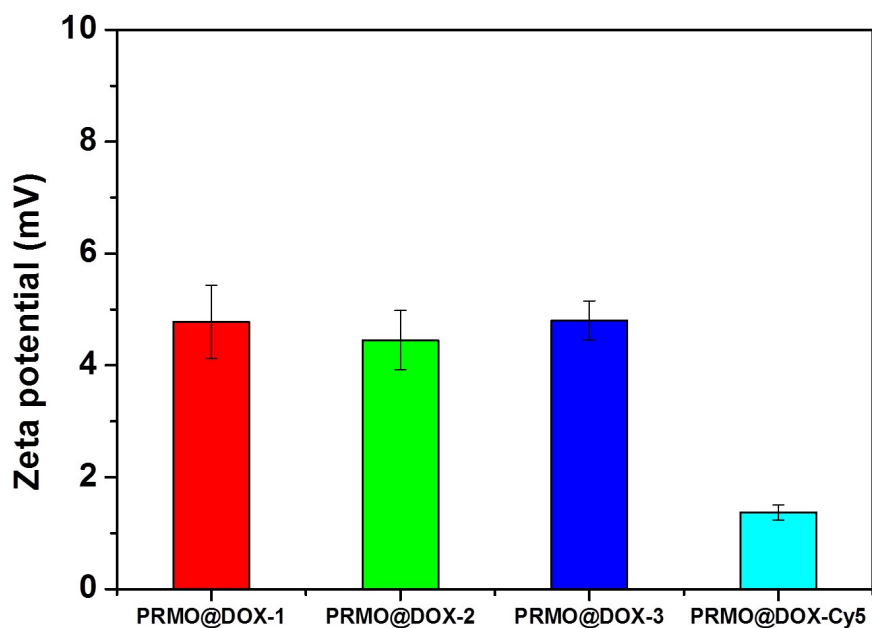

**Figure S7.** Zeta potential of PRMO@DOX-1, PRMO@DOX-2, PRMO@DOX-3 and PRMO@DOX-Cy5 in water medium. Data are presented as means  $\pm$  SD (n =3).

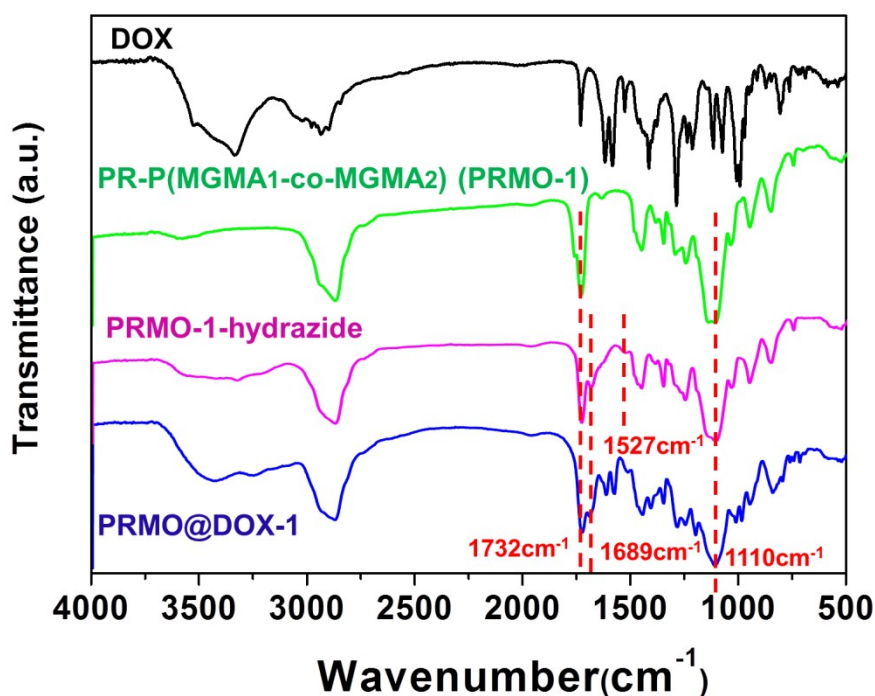

**Figure S8.** FT-IR spectra of DOX, PRMO-1, PRMO-1-hydrazide and PRMO@DOX-1.

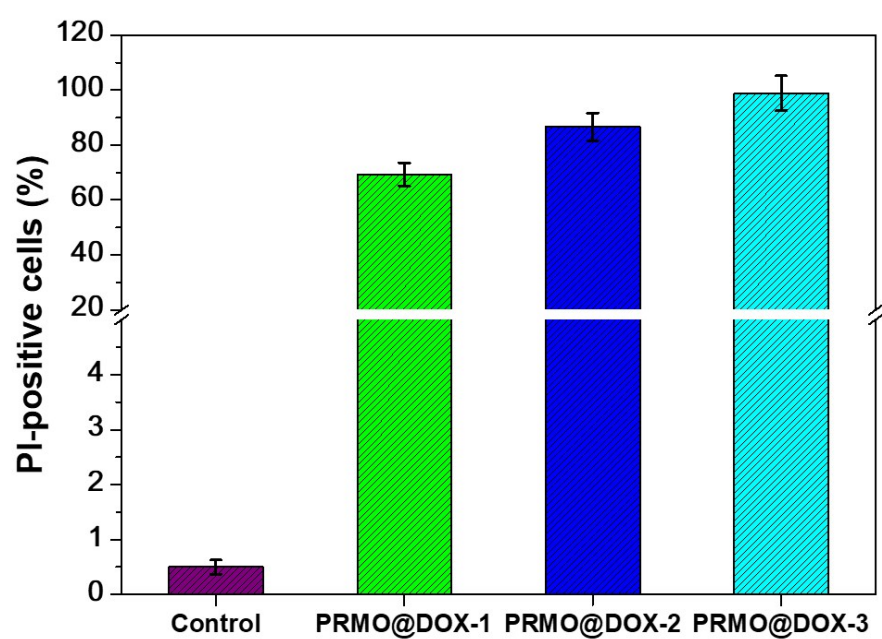

**Figure S9.** PI-positive HeLa cells after treatment by PBS (control), PRMO@DOX-1, PRMO@DOX-2 and PRMO@DOX-3 for 24 h. Data are presented as means  $\pm$  SD (n =3).

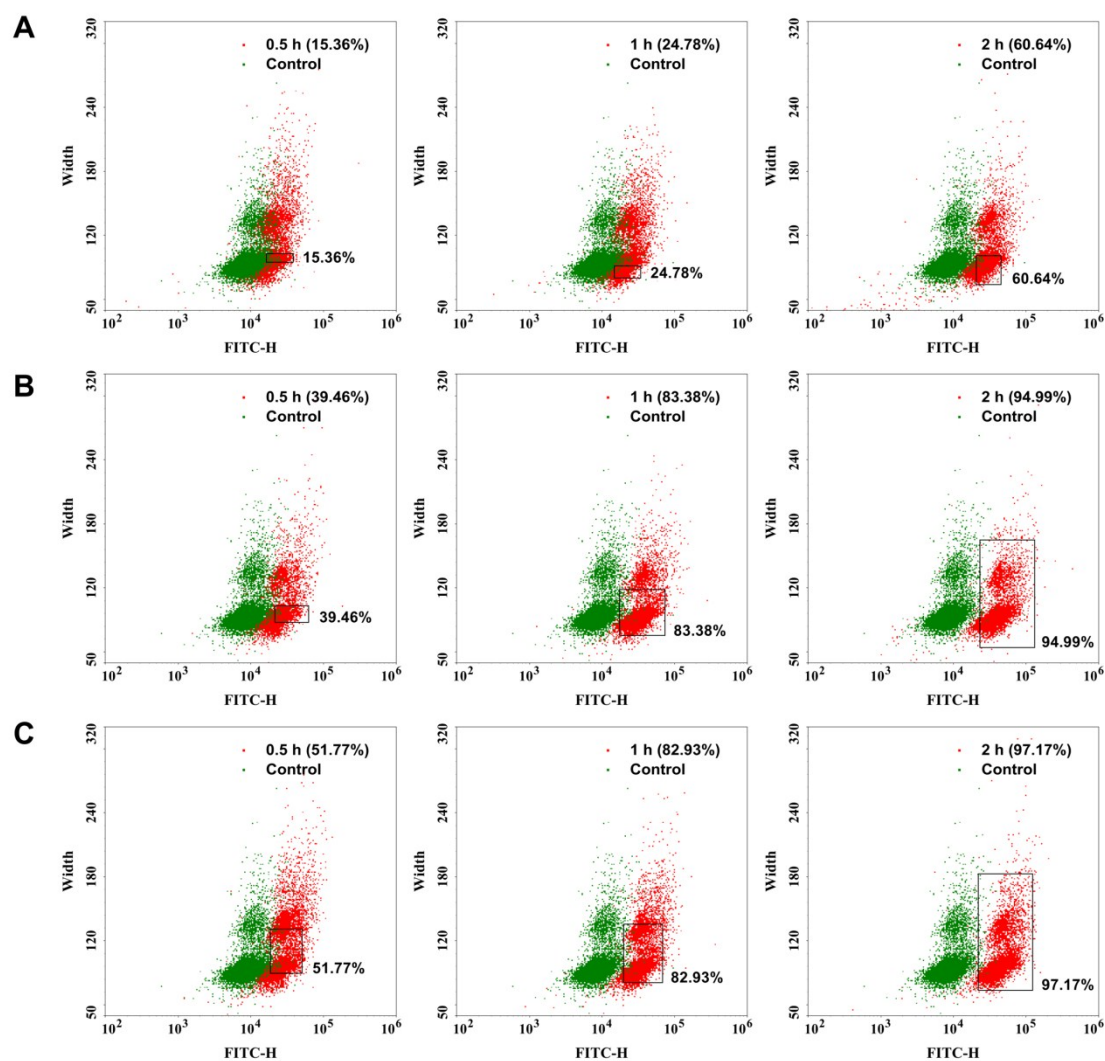

**Figure S10.** Flow cytometry analysis of HeLa cells after incubation with (A) PRMO@DOX-1, (B) PRMO@DOX-2, (C) PRMO@DOX-3 for 0.5h, 1h and 2h, respectively.

**Table S1.** Size, polydispersity index (PDI) and  $\zeta$ -potential of PRMO@DOX-1, PRMO@DOX-2 and PRMO@DOX-3 measured by DLS and TEM

| Sample            | Size <sup>a</sup> (nm) | PDI <sup>b</sup> | D <sup>c</sup> (nm) | SD <sup>c</sup> (nm) | $\zeta$ -potential <sup>d</sup> |
|-------------------|------------------------|------------------|---------------------|----------------------|---------------------------------|
| <b>PRMO@DOX-1</b> | 63.56                  | 0.352            | 41.1                | 6.2                  | 4.78 $\pm$ 0.65                 |
| <b>PRMO@DOX-2</b> | 42.61                  | 0.255            | 26.8                | 5.3                  | 4.45 $\pm$ 0.53                 |
| <b>PRMO@DOX-3</b> | 21.1                   | 0.25             | 13.2                | 4.2                  | 4.8 $\pm$ 0.35                  |

<sup>a</sup>Size and PDI <sup>b</sup> of PRMO@DOX-1, PRMO@DOX-2 and PRMO@DOX-3 micelles in water were measured by DLS; <sup>c</sup>Average diameter (D) and standard deviation (SD) were calculated by measuring 50 micelles in a TEM image.; <sup>d</sup> $\zeta$ -potential were measured by DLS.
